# Supplementary material for: Patient Perspectives on Physician Accessibility Through Mobile Communication: A Cross-Sectional Study from a Tertiary Hospital in Pakistan
Source: Research Square preprint supplement (doi:10.21203/rs.3.rs-7665781/v1), 2025-10-23
Supplement: Supplementary file 1 [file 84db97890cb6ebdcad34c279.docx]

**Questionnaire:**

1. Gender
2. Male
3. Female
4. Other

آپ کی جنس کیا ہے؟

مرد

عورت

کوئی اور

1. Age (years) ______

آپ کی عمر کیا ہے؟

1. Where do you live? _______

آپ کہاں رہتے ہیں

1. What is your level of education? __________

آپ کی تعلیم کی سطح کیا ہے؟

1. How do you feel about getting your physician’s cell phone number?
2. Very interested
3. Would not object
4. Not interested

آپ اپنے معالج کا سیل فون نمبر حاصل کرنے کے بارے میں کیسا محسوس کرتے ہیں؟

بہت دلچسپی ہے

اعتراض نہیں

دلچسپی نہیں

1. Getting my physician’s cell phone number could improve the relationship between us:
   1. Strongly Agree
   2. Agree
   3. No Opinion
   4. Disagree
   5. Strongly Disagree

اپنے معالج کا سیل فون نمبر حاصل کرنا ہمارے درمیان تعلقات کو بہتر بنا سکتا ہے

سختی سے متفق

متفق

کوئی رائے نہیں

متفق نہیں

سختی سے متفق نہیں

1. Getting my physician’s cellphone number could improve my sense of security even if I don’t use it:
   1. Strongly Agree
   2. Agree
   3. No Opinion
   4. Disagree
   5. Strongly Disagree

اپنے معالج کا سیل فون نمبر حاصل کرنا میرے احساس تحفظ کو بہتر بنا سکتا ہے چاہے میں اسے استعمال نہ کروں

سختی سے متفق

متفق

کوئی رائے نہیں

متفق نہیں

سختی سے متفق نہیں

1. The cell phone is an effective means of communication that could solve my problems:
   1. Strongly Agree
   2. Agree
   3. No Opinion
   4. Disagree
   5. Strongly Disagree

سیل فون رابطے کا ایک مؤثر ذریعہ ہے جو میرے مسائل کو حل کرسکتا ہے۔

سختی سے متفق

متفق

کوئی رائے نہیں

متفق نہیں

سختی سے متفق نہی

1. The physician is legally responsible for any error made during this consultation:
   1. Strongly Agree
   2. Agree
   3. No Opinion
   4. Disagree
   5. Strongly Disagree

اس مشاورت کے دوران ہونے والی کسی بھی غلطی کا قانونی طور پر ڈاکٹر ذمہ دار ہے۔

سختی سے متفق

متفق

کوئی رائے نہیں

متفق نہیں

سختی سے متفق نہیں

1. At what times are you most likely to call the physician?
   1. Only appointed hours
   2. Only during daytime (except weekends)
   3. At all hours irrespective of time or holiday

آپ کو کن اوقات میں ڈاکٹر کو کال کرنے کا زیادہ امکان ہے۔

صرف مقررہ اوقات

صرف دن کے وقت (سوائے ویک اینڈ کے)

وقت یا چھٹی سے قطع نظر ہر وقت

1. Under which circumstance would you call your physician?
   1. Only in emergencies
   2. Whenever I think I need consultation

کن حالات میں آپ اپنے معالج کو کال کریں گے۔

صرف ہنگامی حالات میں

جب بھی مجھے لگتا ہے کہ مجھے مشاورت کی ضرورت ہے۔

1. Do you think getting your physician’s cell phone number could interfere with his/her privacy when they’re not working:
   1. Strongly Agree
   2. Agree
   3. No Opinion
   4. Disagree
   5. Strongly Disagree

کیا آپ کو لگتا ہے کہ آپ کے ڈاکٹر کا سیل فون نمبر حاصل کرنا اس کی رازداری میں مداخلت کر سکتا ہے جب وہ کام نہیں کر رہے ہیں

سختی سے متفق

متفق

کوئی رائے نہیں

متفق نہیں

سختی سے متفق نہیں

1. The physician should not be called because there is a risk of miscommunication:
   1. Strongly Agree
   2. Agree
   3. No Opinion
   4. Disagree
   5. Strongly Disagree

ڈاکٹر کو فون نہیں کیا جانا چاہئے کیونکہ غلط رابطے کا خطرہ ہے۔

سختی سے متفق

متفق

کوئی رائے نہیں

متفق نہیں

سختی سے متفق نہیں

1. The physician should not be called because it can interfere with his clinic work:
   1. Strongly Agree
   2. Agree
   3. No Opinion
   4. Disagree
   5. Strongly Disagree

ڈاکٹر کو فون نہیں کیا جانا چاہئے کیونکہ یہ اس کے کلینک کے کام میں مداخلت کر سکتا ہے۔

سختی سے متفق

متفق

کوئی رائے نہیں

متفق نہیں

سختی سے متفق نہیں

1. The physician is obliged to answer to questions, within an hour of asking the question:
   1. Strongly Agree
   2. Agree
   3. No Opinion
   4. Disagree
   5. Strongly Disagree

ڈاکٹر سوال پوچھنے کے ایک گھنٹے کے اندر سوالات کا جواب دینے کا پابند ہے۔

سختی سے متفق

متفق

کوئی رائے نہیں

متفق نہیں

سختی سے متفق نہیں

1. If the hospital provided the physician with a cell phone and paid for it, that would motivate him/her to provide the cell phone number:
   1. Strongly Agree
   2. Agree
   3. No Opinion
   4. Disagree
   5. Strongly Disagree

\اگر ہسپتال نے ڈاکٹر کو سیل فون فراہم کیا اور اس کے لیے ادائیگی کی، تو یہ اسے سیل فون نمبر فراہم کرنے کی ترغیب دے گا۔

سختی سے متفق

متفق

کوئی رائے نہیں

متفق نہیں

سختی سے متفق نہیں

1. If the hospital gave the physician extra pay for cell phone consultations, it would motivate him/her to provide the cell phone number:
   1. Strongly Agree
   2. Agree
   3. No Opinion
   4. Disagree
   5. Strongly Disagree

اگر ہسپتال نے ڈاکٹر کو سیل فون کے مشورے کے لیے اضافی تنخواہ دی، تو یہ اسے سیل فون نمبر فراہم کرنے کی ترغیب دے گا۔

سختی سے متفق

متفق

کوئی رائے نہیں

متفق نہیں

سختی سے متفق نہیں

1. If the hospital gave the physician dedicated time for cell phone consultations, it would motivate him/her to provide the cell phone number:
   1. Strongly Agree
   2. Agree
   3. No Opinion
   4. Disagree
   5. Strongly Disagree

اگر ہسپتال نے ڈاکٹر کو سیل فون کے مشورے کے لیے مخصوص وقت دیا، تو یہ اسے سیل فون نمبر فراہم کرنے کی ترغیب دے گا۔

سختی سے متفق

متفق

کوئی رائے نہیں

متفق نہیں

سختی سے متفق نہیں

1. Have you asked for your physician’s cell phone number in the past?
   1. Strongly Agree
   2. Agree
   3. No Opinion
   4. Disagree
   5. Strongly Disagree

کیا آپ نے ماضی میں اپنے معالج کا سیل فون نمبر مانگا ہے؟

سختی سے متفق

متفق

کوئی رائے نہیں

متفق نہیں

سختی سے متفق نہیں

1. If yes, how was your experience:
   1. Satisfied
   2. Neutral
   3. Dissatisfied

اگر ہاں، تو آپ کا تجربہ کیسا رہا؟

مطمئن

غیر جانبدار

غیر مطمئن

1. Which platform did you use for the consultation?
   1. Email
   2. Phone Number
   3. Whatsapp
   4. Other (Please specify)

آپ نے مشاورت کے لیے کون سا پلیٹ فارم استعمال کیا؟

ای میل

فون نمبر

واٹس ایپ

ان کے علاوہ (براہ کرم وضاحت کریں)

1. Do you have your physician's cell phone number?
   1. Strongly Agree
   2. Agree
   3. No Opinion
   4. Disagree
   5. Strongly Disagree

کیا آپ کے پاس اپنے معالج کا سیل فون نمبر ہے؟

سختی سے متفق

متفق

کوئی رائے نہیں

متفق نہیں

سختی سے متفق نہیں
